# Supplementary material for: The speciation and adaptation of the polyploids: a case study of the Chinese Isoetes L. diploid-polyploid complex
Source: PubMed Central journal article supplement (PMC7490897; doi:10.1186/s12862-020-01687-4), 2020-09-14

*I.sin (tai) = I.sin (yun)*

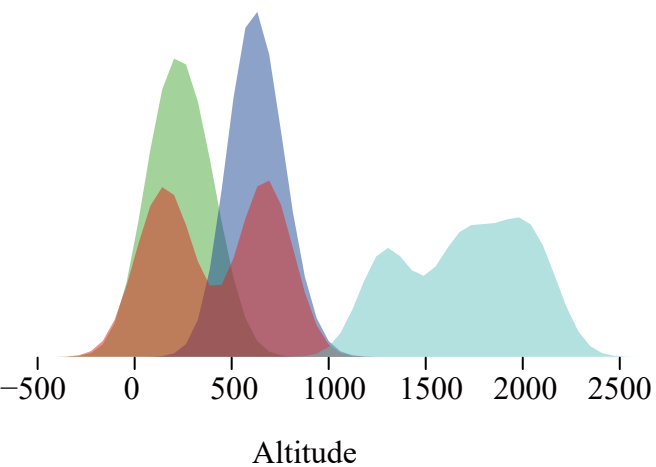

*I.sin (tai) = I.sin (yun)*

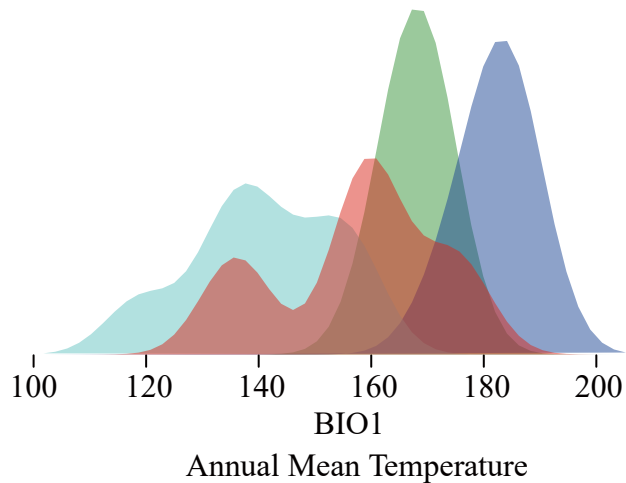

*I.sin (tai) = I.sin (yun)*

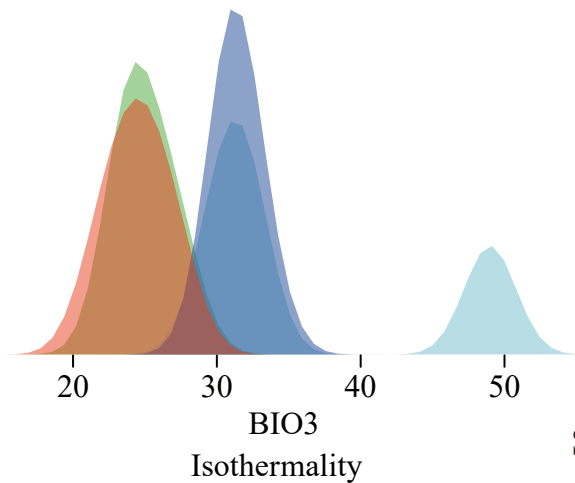

Species

■ *I. sinensis*(tai) 4×

■ *I. sinensis*(yun) 4×

■ *I. taiwanensis* 2×

■ *I. yunguiensis* 2×

Temperature (°C x 10)

Precipitation (mm)

*I.sin (tai) = I.sin (yun)*

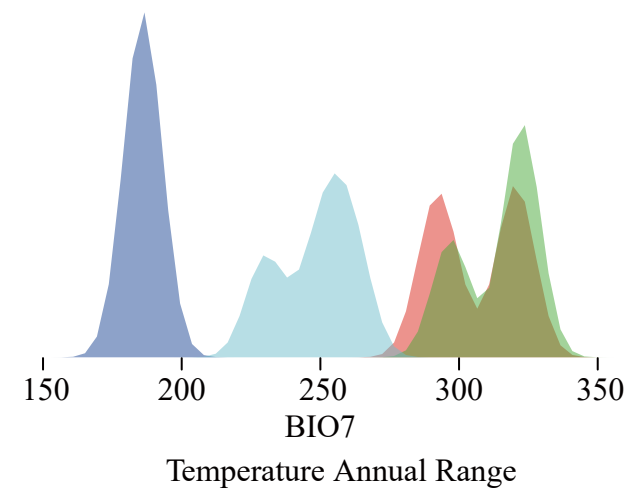

*I.sin (tai) = I.sin (yun)*

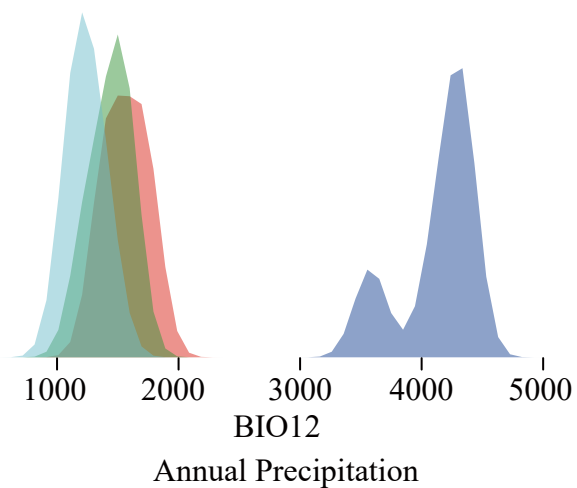

*I.sin (tai) = I.sin (yun)*

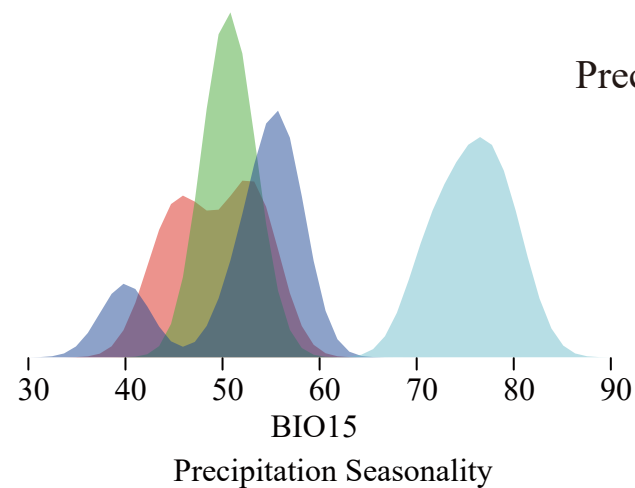

Supplement: 12862_2020_1687_MOESM2_ESM.pdf [file 12862_2020_1687_MOESM2_ESM.pdf]
